# Supplementary material for: Mortality Risks after Two Years in Frail and Pre-Frail Older Adults Admitted to Hospital
Source: MDPI journal article supplement (doi:10.3390/jcm12093103), 2023-04-24
Supplement: s1 [file s1]

Supplementary material for “MORTALITY RISKS IN  
FRAIL and PRE-FRAIL OLDER ADULTS ADMITTED TO HOSPITAL  
AFTER TWO YEARS”

January 3, 2023

**Table S1: Independent Samples T-Test**

| <b>Independent Samples T-Test</b> |          |           |                     |
|-----------------------------------|----------|-----------|---------------------|
|                                   | <b>t</b> | <b>df</b> | <b>p</b>            |
| Age                               | 6.365    | 712       | < .001 <sup>a</sup> |
| Gender                            | 3.616    | 712       | < .001 <sup>a</sup> |
| Weight                            | -3.478   | 696       | < .001              |
| Readmission30                     | -3.429   | 712       | < .001 <sup>a</sup> |
| Married                           | 0.448    | 712       | 0.654               |
| Single                            | 0.635    | 712       | 0.525               |
| Divorced                          | -0.537   | 712       | 0.592               |
| Widowed                           | -3.619   | 712       | < .001 <sup>a</sup> |
| Descendency                       | -0.547   | 556       | 0.585               |
| Needswalkingstick                 | -8.387   | 592       | < .001 <sup>a</sup> |
| Ownhome                           | 3.382    | 617       | < .001 <sup>a</sup> |
| Alone                             | 1.600    | 622       | 0.110 <sup>a</sup>  |
| Othershome                        | -1.695   | 612       | 0.091 <sup>a</sup>  |
| Retirementhouse                   | -2.613   | 613       | 0.009 <sup>a</sup>  |
| Barthel                           | -8.359   | 656       | < .001              |
| Pfeiffer                          | 3.938    | 709       | < .001 <sup>a</sup> |
| MNA                               | 9.864    | 712       | < .001              |
| MNAWeightloss3m                   | -7.555   | 712       | < .001 <sup>a</sup> |
| MNAMobility                       | -8.444   | 712       | < .001 <sup>a</sup> |
| MNAAcutedisease3m                 | -2.861   | 711       | 0.004 <sup>a</sup>  |
| MNANeuropsychologicalproblems     | -2.006   | 712       | 0.045 <sup>a</sup>  |
| MNACalfcircumference              | -4.068   | 712       | < .001 <sup>a</sup> |
| MNAAppetiteloss3m                 | -5.801   | 712       | < .001 <sup>a</sup> |
| SPPB                              | -12.708  | 711       | < .001 <sup>a</sup> |
| SPPBSitandgetup                   | -10.154  | 710       | < .001 <sup>a</sup> |
| SPPBBalance                       | -8.689   | 709       | < .001              |
| SPPBMarch4m                       | -14.559  | 707       | < .001 <sup>a</sup> |
| Hearingloss                       | -3.194   | 712       | 0.001 <sup>a</sup>  |
| Visionloss                        | -2.088   | 712       | 0.037 <sup>a</sup>  |
| Constipation                      | -3.710   | 712       | < .001 <sup>a</sup> |
| Falls                             | -3.453   | 712       | < .001 <sup>a</sup> |
| Dysphagia                         | -3.444   | 712       | < .001 <sup>a</sup> |
| AHT                               | -1.540   | 712       | 0.124 <sup>a</sup>  |
| Cho                               | 0.567    | 712       | 0.571               |
| Smoker                            | 0.425    | 712       | 0.671               |
| Exsmoker                          | 1.350    | 712       | 0.178 <sup>a</sup>  |
| Arrhythmia                        | -2.044   | 712       | 0.041 <sup>a</sup>  |
| Syncope                           | 0.812    | 712       | 0.417               |
| Headtrauma                        | -1.045   | 712       | 0.297 <sup>a</sup>  |
| AMI                               | 1.026    | 712       | 0.305 <sup>a</sup>  |
| Congestiveheartfailure            | -3.573   | 712       | < .001 <sup>a</sup> |

# Independent Samples T-Test

|                           | t      | df  | p                   |
|---------------------------|--------|-----|---------------------|
| Peripheralvascularisease  | 1.418  | 712 | 0.157 <sup>a</sup>  |
| Deepvenousthrombosis      | 1.969  | 712 | 0.049 <sup>a</sup>  |
| Pulmonaryembolism         | 1.007  | 712 | 0.314 <sup>a</sup>  |
| Cerebrovascularisease     | -2.407 | 712 | 0.016 <sup>a</sup>  |
| Dementia                  | -1.986 | 712 | 0.047 <sup>a</sup>  |
| COPDAsthma                | -0.259 | 712 | 0.796               |
| Connectivetissuepathology | -1.866 | 712 | 0.062 <sup>a</sup>  |
| Ulcerdisease              | 0.558  | 712 | 0.577               |
| Diabetes                  | -2.738 | 712 | 0.006 <sup>a</sup>  |
| Diabeteswithorgandamage   | -1.399 | 712 | 0.162 <sup>a</sup>  |
| Kidneypathology           | -2.207 | 712 | 0.028 <sup>a</sup>  |
| Ooncology                 | 1.279  | 712 | 0.201 <sup>a</sup>  |
| Depression                | -2.563 | 712 | 0.011 <sup>a</sup>  |
| Mooddisorder              | -2.545 | 712 | 0.011 <sup>a</sup>  |
| Osteo                     | -1.753 | 712 | 0.080 <sup>a</sup>  |
| Thyroid                   | -2.244 | 712 | 0.025 <sup>a</sup>  |
| Epilepsy                  | 0.074  | 712 | 0.941               |
| Glaucoma                  | -1.399 | 712 | 0.162 <sup>a</sup>  |
| Delirium                  | -2.074 | 712 | 0.038 <sup>a</sup>  |
| DrugOligopharma           | 4.004  | 712 | < .001 <sup>a</sup> |
| DrugModerate              | -1.066 | 712 | 0.287 <sup>a</sup>  |
| DrugSevere                | -2.547 | 712 | 0.011 <sup>a</sup>  |
| IBP                       | -2.360 | 712 | 0.019               |
| Antiplaetet               | 1.984  | 712 | 0.048 <sup>a</sup>  |
| Hypnotic                  | -3.318 | 712 | < .001 <sup>a</sup> |
| Benzodiazapine            | -2.701 | 712 | 0.007 <sup>a</sup>  |
| Zolpidem                  | -2.164 | 712 | 0.031 <sup>a</sup>  |
| Neuroleptics              | -2.297 | 712 | 0.022 <sup>a</sup>  |
| Quetiapine                | -2.189 | 712 | 0.029 <sup>a</sup>  |
| Risperdal                 | -0.482 | 712 | 0.630               |
| Otherantipsychotics       | -0.270 | 712 | 0.787               |
| Antiepileptic             | -0.739 | 712 | 0.460               |
| Antiparkinsonian          | -0.850 | 712 | 0.395               |
| AISRS                     | -2.323 | 712 | 0.020 <sup>a</sup>  |
| ATricyclic                | -0.187 | 712 | 0.852               |
| AHeterocyclic             | -2.442 | 712 | 0.015 <sup>a</sup>  |
| ADual                     | 1.084  | 712 | 0.279 <sup>a</sup>  |
| Insulin                   | -1.533 | 712 | 0.126 <sup>a</sup>  |
| Arrhythmics               | -3.095 | 712 | 0.002 <sup>a</sup>  |
| Digoxin                   | -1.657 | 712 | 0.098 <sup>a</sup>  |
| Antiarrhythmic            | -0.149 | 712 | 0.882               |
| Calciumantagonist         | -0.861 | 712 | 0.389               |
| ACEinhibitor              | 0.984  | 712 | 0.326               |

### Independent Samples T-Test

|                       | t      | df  | p                   |
|-----------------------|--------|-----|---------------------|
| BAT1                  | 0.810  | 712 | 0.418               |
| Betablocker           | -0.993 | 712 | 0.321 <sup>a</sup>  |
| NitratesNitroglycerin | 1.009  | 712 | 0.313 <sup>a</sup>  |
| Diuretics             | -3.415 | 712 | < .001              |
| Lipidmodifier         | 1.323  | 712 | 0.186 <sup>a</sup>  |
| Inhaled               | -1.369 | 712 | 0.171 <sup>a</sup>  |
| Genitourinary         | -0.740 | 712 | 0.460               |
| Antagoalfaadrenerg    | 0.530  | 712 | 0.596               |
| Inhrest5alfa          | -0.876 | 712 | 0.381               |
| Antispasmodics        | -0.569 | 712 | 0.569               |
| Uricosurics           | -0.666 | 712 | 0.506               |
| Laxatives             | -1.745 | 712 | 0.081 <sup>a</sup>  |
| Opiates               | -2.986 | 712 | 0.003 <sup>a</sup>  |
| Paracetamol           | -2.116 | 712 | 0.035 <sup>a</sup>  |
| OtherNSAIDs           | -1.262 | 712 | 0.207 <sup>a</sup>  |
| Ophthalmus            | -0.918 | 712 | 0.359               |
| Anticoagulated        | -2.018 | 712 | 0.044 <sup>a</sup>  |
| Antidepressant        | -3.647 | 712 | < .001 <sup>a</sup> |
| Antidiabetics         | -2.291 | 712 | 0.022 <sup>a</sup>  |
| Alphaadrenergic       | 0.686  | 712 | 0.493               |

*Note.* Student's t-test.

<sup>a</sup> Levene's test is significant ( $p < .05$ ), suggesting a violation of the equal variance assumption

Table S2: Logistic Regression

| Model Summary - Fried |          |                |                           |            |                |                |                         |                           |                         |                            |
|-----------------------|----------|----------------|---------------------------|------------|----------------|----------------|-------------------------|---------------------------|-------------------------|----------------------------|
| Model                 | Deviance | AIC            | BIC                       | df         | X <sup>2</sup> | p              | McFadden R <sup>2</sup> | Nagelkerke R <sup>2</sup> | Tjur R <sup>2</sup>     | Cox & Snell R <sup>2</sup> |
| H <sub>0</sub>        | 608.143  | 610.143        | 614.423                   | 533        |                |                |                         |                           |                         |                            |
| H <sub>1</sub>        | 388.856  | 500.856        | 740.559                   | 478        | 219.286        | < .001         | 0.361                   | 0.495                     | 0.396                   | 0.337                      |
| Coefficients          |          |                |                           |            |                |                |                         |                           |                         |                            |
|                       | Estimate | Standard Error | Standardized <sup>+</sup> | Odds Ratio | z              | Wald Statistic | df                      | p                         | 95% Confidence interval |                            |
|                       |          |                |                           |            |                |                |                         |                           | Lower bound             | Upper bound                |
| (Intercept)           | -12.338  | 4.690          | -1.987                    | 4.380e-6   | -2.631         | 6.922          | 1                       | 0.009                     | 21.530                  | -3.147                     |
| Age                   | -0.020   | 0.028          | 0.123                     | 0.980      | -0.715         | 0.511          | 1                       | 0.475                     | -0.076                  | 0.035                      |
| Gender                | -0.357   | 0.350          | 0.179                     | 0.700      | -1.021         | 1.042          | 1                       | 0.307                     | -1.043                  | 0.329                      |
| Weight                | 0.010    | 0.014          | 0.134                     | 1.010      | 0.704          | 0.496          | 1                       | 0.481                     | -0.018                  | 0.038                      |
| Readmission30         | 0.628    | 0.389          | 0.236                     | 1.874      | 1.615          | 2.608          | 1                       | 0.106                     | -0.134                  | 1.391                      |
| Widowed               | 0.010    | 0.308          | 0.005                     | 1.010      | 0.033          | 0.001          | 1                       | 0.973                     | -0.594                  | 0.615                      |
| Needswalkingstick     | 0.842    | 0.318          | 0.392                     | 2.321      | 2.649          | 7.019          | 1                       | 0.008                     | 0.219                   | 1.465                      |
| Ownhome               | -0.137   | 0.517          | 0.052                     | 0.872      | -0.264         | 0.070          | 1                       | 0.792                     | -1.150                  | 0.877                      |
| Retirementhouse       | 0.054    | 0.698          | 0.016                     | 1.055      | 0.077          | 0.006          | 1                       | 0.939                     | -1.314                  | 1.421                      |
| Barthel               | 0.256    | 0.283          | 0.180                     | 1.291      | 0.904          | 0.817          | 1                       | 0.366                     | -0.299                  | 0.810                      |

# Model Summary - Fried

| Model                         | Deviance | AIC | BIC    | df    | X <sup>2</sup> | p     | McFadden R <sup>2</sup> |        | Nagelkerke R <sup>2</sup> |        | Tjur R <sup>2</sup> | Cox & Snell R <sup>2</sup> |
|-------------------------------|----------|-----|--------|-------|----------------|-------|-------------------------|--------|---------------------------|--------|---------------------|----------------------------|
| Pfeiffer                      |          |     | 0.170  | 0.212 | 0.159          | 1.185 | 0.800                   | 0.641  | 1                         | 0.423  | -0.246              | 0.585                      |
| MNA                           |          |     | 0.501  | 0.470 | 0.348          | 1.651 | 1.067                   | 1.139  | 1                         | 0.286  | -0.419              | 1.421                      |
| MNAWeightloss3m               |          |     | 0.683  | 0.197 | 0.812          | 1.980 | 3.467                   | 12.019 | 1                         | < .001 | 0.297               | 1.070                      |
| MNAMobility                   |          |     | 2.165  | 0.599 | 1.029          | 8.717 | 3.612                   | 13.046 | 1                         | < .001 | 0.990               | 3.340                      |
| MNAAcutedisease3m             |          |     | 0.395  | 0.372 | 0.166          | 1.484 | 1.061                   | 1.127  | 1                         | 0.289  | -0.334              | 1.124                      |
| MNANeuropsychologicalproblems |          |     | -0.597 | 0.447 | -              | 0.551 | -1.336                  | 1.785  | 1                         | 0.182  | -1.472              | 0.279                      |
| MNACalfcircumference          |          |     | 0.181  | 0.181 | 0.236          | 1.198 | 0.996                   | 0.993  | 1                         | 0.319  | -0.175              | 0.536                      |
| MNAAppetite loss3m            |          |     | 0.291  | 0.247 | 0.220          | 1.338 | 1.177                   | 1.386  | 1                         | 0.239  | -0.194              | 0.776                      |
| SPPB                          |          |     | 0.092  | 0.456 | 0.087          | 1.096 | 0.201                   | 0.040  | 1                         | 0.841  | -0.802              | 0.986                      |
| SPPBSit and get up            |          |     | 0.175  | 0.226 | 0.196          | 1.192 | 0.776                   | 0.602  | 1                         | 0.438  | -0.268              | 0.619                      |
| SPPBBalance                   |          |     | -0.013 | 0.190 | -              | 0.987 | -0.067                  | 0.004  | 1                         | 0.947  | -0.385              | 0.360                      |
| SPPBMarch4m                   |          |     | 0.590  | 0.210 | 0.590          | 1.804 | 2.810                   | 7.897  | 1                         | 0.005  | 0.179               | 1.002                      |
| Hearing loss                  |          |     | -0.331 | 0.344 | -              | 0.718 | -0.961                  | 0.924  | 1                         | 0.336  | -1.006              | 0.344                      |
| Vision loss                   |          |     | -0.150 | 0.354 | -              | 0.860 | -0.425                  | 0.181  | 1                         | 0.671  | -0.844              | 0.543                      |
| Constipation                  |          |     | 0.350  | 0.311 | 0.167          | 1.420 | 1.126                   | 1.268  | 1                         | 0.260  | -0.259              | 0.960                      |
| Falls                         |          |     | -0.618 | 0.319 | -              | 0.539 | -1.936                  | 3.749  | 1                         | 0.053  | -1.243              | 0.008                      |
| Dysphagia                     |          |     | 0.487  | 0.535 | 0.163          | 1.627 | 0.909                   | 0.827  | 1                         | 0.363  | -0.562              | 1.535                      |
| Arrhythmia                    |          |     | -0.203 | 0.436 | -              | 0.816 | -0.467                  | 0.218  | 1                         | 0.641  | -1.057              | 0.651                      |
| Congestive heart failure      |          |     | 0.490  | 0.349 | 0.229          | 1.632 | 1.404                   | 1.972  | 1                         | 0.160  | -0.194              | 1.174                      |

### Model Summary - Fried

| Model                  | Deviance | AIC | BIC    | df    | X <sup>2</sup> | p     | McFadden R <sup>2</sup> |       | Nagelkerke R <sup>2</sup> |       | Tjur R <sup>2</sup> | Cox & Snell R <sup>2</sup> |
|------------------------|----------|-----|--------|-------|----------------|-------|-------------------------|-------|---------------------------|-------|---------------------|----------------------------|
| Deepvenousthrombosis   |          |     | -0.928 | 0.607 | -              | 0.395 | -1.529                  | 2.339 | 1                         | 0.126 | -2.117              | 0.261                      |
|                        |          |     |        |       | 0.189          |       |                         |       |                           |       |                     |                            |
| Cerebrovasculardisease |          |     | 0.161  | 0.412 | 0.059          | 1.174 | 0.390                   | 0.152 | 1                         | 0.696 | -0.647              | 0.968                      |
| Dementia               |          |     | 2.146  | 0.965 | 0.436          | 8.552 | 2.225                   | 4.950 | 1                         | 0.026 | 0.256               | 4.037                      |
| Diabetes               |          |     | 0.790  | 0.551 | 0.374          | 2.204 | 1.434                   | 2.057 | 1                         | 0.152 | -0.290              | 1.870                      |
| Kidneypathology        |          |     | -0.219 | 0.358 | -              | 0.804 | -0.610                  | 0.372 | 1                         | 0.542 | -0.921              | 0.484                      |
|                        |          |     |        |       | 0.089          |       |                         |       |                           |       |                     |                            |
| Depression             |          |     | 1.641  | 0.780 | 0.465          | 5.162 | 2.104                   | 4.427 | 1                         | 0.035 | 0.112               | 3.171                      |
| Mooddisorder           |          |     | 1.336  | 0.745 | 0.364          | 3.804 | 1.793                   | 3.214 | 1                         | 0.073 | -0.125              | 2.797                      |
| Thyroid                |          |     | 0.211  | 0.456 | 0.072          | 1.235 | 0.463                   | 0.214 | 1                         | 0.644 | -0.682              | 1.104                      |
| Delirium               |          |     | -0.734 | 0.370 | -              | 0.480 | -1.987                  | 3.947 | 1                         | 0.047 | -1.459              | -0.010                     |
|                        |          |     |        |       | 0.325          |       |                         |       |                           |       |                     |                            |
| DrugOligopharma        |          |     | -0.584 | 0.386 | -              | 0.557 | -1.514                  | 2.291 | 1                         | 0.130 | -1.341              | 0.172                      |
|                        |          |     |        |       | 0.236          |       |                         |       |                           |       |                     |                            |
| DrugSevere             |          |     | 0.083  | 0.404 | 0.039          | 1.086 | 0.204                   | 0.042 | 1                         | 0.838 | -0.710              | 0.875                      |
| IBP                    |          |     | -0.270 | 0.303 | -              | 0.763 | -0.890                  | 0.793 | 1                         | 0.373 | -0.865              | 0.324                      |
|                        |          |     |        |       | 0.135          |       |                         |       |                           |       |                     |                            |
| Antiplatelet           |          |     | -0.329 | 0.343 | -              | 0.719 | -0.959                  | 0.920 | 1                         | 0.338 | -1.002              | 0.344                      |
|                        |          |     |        |       | 0.150          |       |                         |       |                           |       |                     |                            |
| Hypnotic               |          |     | 2.150  | 1.820 | 1.023          | 8.586 | 1.181                   | 1.396 | 1                         | 0.237 | -1.417              | 5.717                      |
| Benzodiazapine         |          |     | -2.012 | 1.799 | -              | 0.134 | -1.119                  | 1.251 | 1                         | 0.263 | -5.537              | 1.513                      |
|                        |          |     |        |       | 0.937          |       |                         |       |                           |       |                     |                            |
| Zolpidem               |          |     | -0.589 | 1.353 | -              | 0.555 | -0.435                  | 0.189 | 1                         | 0.664 | -3.240              | 2.063                      |
|                        |          |     |        |       | 0.114          |       |                         |       |                           |       |                     |                            |
| Neuroleptics           |          |     | 0.127  | 0.642 | 0.036          | 1.136 | 0.198                   | 0.039 | 1                         | 0.843 | -1.131              | 1.386                      |

# Model Summary - Fried

| Model          | Deviance | AIC | BIC    | df    | X <sup>2</sup> | p     | McFadden R <sup>2</sup> |       | Nagelkerke R <sup>2</sup> |       | Tjur R <sup>2</sup> | Cox & Snell R <sup>2</sup> |
|----------------|----------|-----|--------|-------|----------------|-------|-------------------------|-------|---------------------------|-------|---------------------|----------------------------|
| Quetiapine     |          |     | 1.064  | 1.511 | 0.176          | 2.898 | 0.704                   | 0.496 | 1                         | 0.481 | -1.898              | 4.026                      |
| AISRS          |          |     | -1.367 | 1.208 | -<br>0.391     | 0.255 | -1.131                  | 1.279 | 1                         | 0.258 | -3.735              | 1.002                      |
| AHeterocyclic  |          |     | -0.651 | 1.176 | -<br>0.204     | 0.521 | -0.554                  | 0.306 | 1                         | 0.580 | -2.957              | 1.654                      |
| Arrhythmics    |          |     | 0.672  | 0.404 | 0.268          | 1.958 | 1.664                   | 2.770 | 1                         | 0.096 | -0.119              | 1.463                      |
| Diuretics      |          |     | -0.140 | 0.311 | -<br>0.069     | 0.869 | -0.451                  | 0.203 | 1                         | 0.652 | -0.750              | 0.469                      |
| Opiates        |          |     | 0.563  | 0.444 | 0.192          | 1.756 | 1.267                   | 1.606 | 1                         | 0.205 | -0.308              | 1.434                      |
| Paracetamol    |          |     | -0.103 | 0.304 | -<br>0.050     | 0.902 | -0.339                  | 0.115 | 1                         | 0.734 | -0.699              | 0.492                      |
| Anticoagulated |          |     | -0.147 | 0.444 | -<br>0.072     | 0.863 | -0.331                  | 0.109 | 1                         | 0.741 | -1.017              | 0.723                      |
| Antidepressant |          |     | 0.509  | 1.089 | 0.214          | 1.664 | 0.468                   | 0.219 | 1                         | 0.640 | -1.625              | 2.644                      |
| Antidiabetics  |          |     | -0.615 | 0.591 | -<br>0.274     | 0.541 | -1.041                  | 1.084 | 1                         | 0.298 | -1.773              | 0.543                      |

Note. Fried level '1' coded as class 1.

+ Standardized estimates represent estimates where the continuous predictors are standardized (X-standardization).



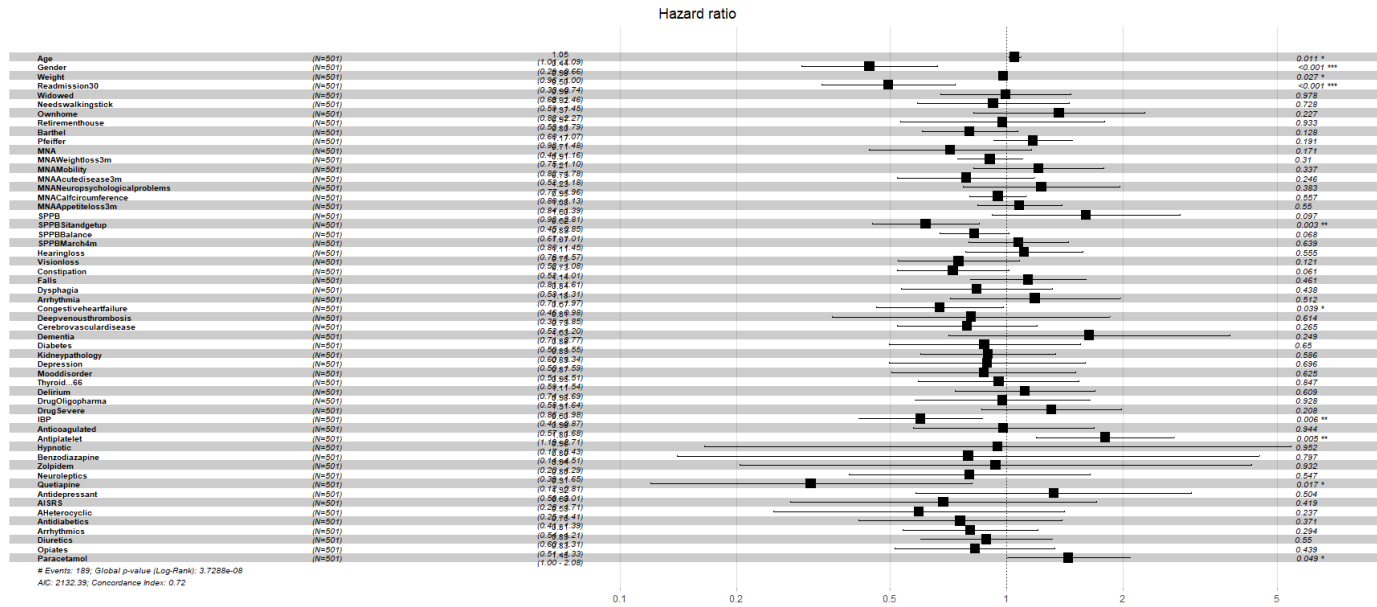

Figure S1: Hazard ratios for the frail cohort, data censored at 2 years.

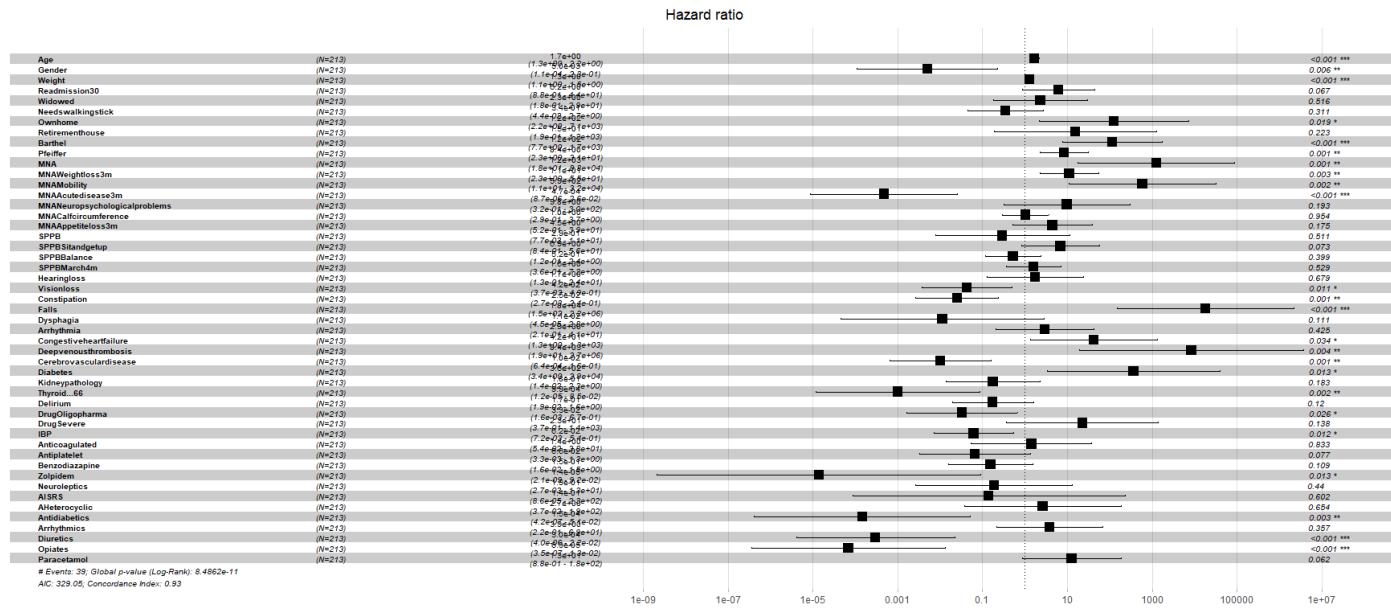

Figure S2: Hazard ratios for the pre-frail cohort, data censored at 2 years.
